# Supplementary material for: Responses of Mytilus galloprovincialis in a Multi-Stressor Scenario: Effects of an Invasive Seaweed Exudate and Microplastic Pollution under Ocean Warming
Source: MDPI journal article supplement (doi:10.3390/toxics11110939), 2023-11-18
Supplement: s1 [file s1]

**Table S1.** Results of a 3-way ANOVA for the biochemical biomarkers responses in the gills of *M. galloprovincialis* with exposure to *A. armata* exudate, PE-MPs and two different temperatures as factors.

| Biomarkers | Factor                         | df | F        | p                 | % Variation |
|------------|--------------------------------|----|----------|-------------------|-------------|
| CAT        | PE-MPs                         | 1  | 94.28    | <b>&lt;0.0001</b> | 32.33       |
|            | Temperature                    | 1  | 82.58    | <b>&lt;0.0001</b> | 28.31       |
|            | Exudate                        | 1  | 7.231    | <b>0.0098</b>     | 2.479       |
|            | PE-MPs x Temperature           | 1  | 54.82    | <b>&lt;0.0001</b> | 18.80       |
|            | PE-MPs x Exudate               | 1  | 4.024    | 0.505             | 1.380       |
|            | Temperature x Exudate          | 1  | 0.1470   | 0.7031            | 0.05042     |
|            | PE-MPs x Temperature x Exudate | 1  | 0.5671   | 0.4551            | 0.1944      |
| GST        | PE-MPs                         | 1  | 14.81    | <b>0.004</b>      | 7.769       |
|            | Temperature                    | 1  | 89.48    | <b>&lt;0.001</b>  | 46.93       |
|            | Exudate                        | 1  | 0.4875   | 0.4884            | 0.2557      |
|            | PE-MPs x Temperature           | 1  | 30.13    | <b>&lt;0.0001</b> | 15.80       |
|            | PE-MPs x Exudate               | 1  | 4.956    | <b>0.0307</b>     | 2.599       |
|            | Temperature x Exudate          | 1  | 1.896    | 0.1749            | 0.9944      |
|            | PE-MPs x Temperature x Exudate | 1  | 0.9063   | 0.3459            | 0.4753      |
| tGSH       | PE-MPs                         | 1  | 75.09    | <b>&lt;0.0001</b> | 27.87       |
|            | Temperature                    | 1  | 113.5    | <b>&lt;0.0001</b> | 42.11       |
|            | Exudate                        | 1  | 2.068    | 0.1570            | 0.7677      |
|            | PE-MPs x Temperature           | 1  | 24.51    | <b>&lt;0.0001</b> | 9.099       |
|            | PE-MPs x Exudate               | 1  | 2.975    | 0.0911            | 1.104       |
|            | Temperature x Exudate          | 1  | 0.004684 | 0.9457            | 0.00179     |
|            | PE-MPs x Temperature x Exudate | 1  | 0.06127  | 0.8056            | 0.02274     |
| AChE       | PE-MPs                         | 1  | 0.08210  | 0.7757            | 0.1537      |
|            | Temperature                    | 1  | 0.04865  | 0.8264            | 0.09107     |
|            | Exudate                        | 1  | 0.2332   | 0.6314            | 0.4365      |
|            | PE-MPs x Temperature           | 1  | 0.8336   | 0.3659            | 1.560       |
|            | PE-MPs x Exudate               | 1  | 0.01388  | 0.9067            | 0.02597     |
|            | Temperature x Exudate          | 1  | 2.134    | 0.1507            | 3.994       |
|            | PE-MPs x Temperature x Exudate | 1  | 3.218    | 0.0793            | 6.023       |
| LPO        | PE-MPs                         | 1  | 1.849    | 0.1803            | 2.470       |
|            | Temperature                    | 1  | 0.4448   | 0.5080            | 0.5942      |
|            | Exudate                        | 1  | 0.7404   | 0.3938            | 0.9892      |
|            | PE-MPs x Temperature           | 1  | 5.385    | <b>0.0246</b>     | 7.194       |
|            | PE-MPs x Exudate               | 1  | 5.365    | <b>0.0249</b>     | 7.168       |
|            | Temperature x Exudate          | 1  | 4.271    | <b>0.0442</b>     | 5.706       |
|            | PE-MPs x Temperature x Exudate | 1  | 8.795    | <b>0.0047</b>     | 11.75       |
| PC         | PE-MPs                         | 1  | 1.953    | 0.1693            | 3.205       |
|            | Temperature                    | 1  | 0.4107   | 0.5250            | 0.6740      |
|            | Exudate                        | 1  | 2.401    | 0.1284            | 3.940       |
|            | PE-MPs x Temperature           | 1  | 1.299    | 0.2607            | 2.131       |
|            | PE-MPs x Exudate               | 1  | 3.199    | 0.0806            | 5.250       |
|            | Temperature x Exudate          | 1  | 5.860    | <b>0.0197</b>     | 9.618       |
|            | PE-MPs x Temperature x Exudate | 1  | 2.972    | 0.0917            | 4.879       |
| HSP70      | PE-MPs                         | 1  | 14.00    | <b>0.0005</b>     | 14.90       |
|            | Temperature                    | 1  | 12.69    | <b>0.0009</b>     | 13.51       |
|            | Exudate                        | 1  | 1.463    | 0.2326            | 1.558       |
|            | PE-MPs x Temperature           | 1  | 2.867    | 0.0972            | 3.052       |
|            | PE-MPs x Exudate               | 1  | 4.247    | <b>0.0450</b>     | 4.521       |
|            | Temperature x Exudate          | 1  | 2.821    | 0.0998            | 3.003       |
|            | PE-MPs x Temperature x Exudate | 1  | 8.925    | <b>0.0045</b>     | 9.500       |

**Table S2.** Results of a 3-way ANOVA for the biochemical biomarkers responses in the digestive gland of *M. galloprovincialis* with exposure to *A. armata* exudate, PE-MPs and two different temperatures as factors.

| Biomarkers | Factor                         | df | F        | p                 | % Variation |
|------------|--------------------------------|----|----------|-------------------|-------------|
| CAT        | PE-MPs                         | 1  | 0.8541   | 0.3600            | 1.578       |
|            | Temperature                    | 1  | 1.038    | 0.3133            | 1.919       |
|            | Exudate                        | 1  | 0.3517   | 0.5559            | 0.6498      |
|            | PE-MPs x Temperature           | 1  | 2.698    | 0.1070            | 4.985       |
|            | PE-MPs x Exudate               | 1  | 0.09021  | 0.7652            | 0.1667      |
|            | Temperature x Exudate          | 1  | 0.7020   | 0.4063            | 1.297       |
|            | PE-MPs x Temperature x Exudate | 1  | 0.3882   | 0.5362            | 0.7173      |
| GST        | PE-MPs                         | 1  | 2.840    | 0.0984            | 4.729       |
|            | Temperature                    | 1  | 4.290    | <b>0.0437</b>     | 7.142       |
|            | Exudate                        | 1  | 2.471    | 0.1226            | 4.114       |
|            | PE-MPs x Temperature           | 1  | 0.6906   | 0.4101            | 1.150       |
|            | PE-MPs x Exudate               | 1  | 0.3578   | 0.5526            | 0.5957      |
|            | Temperature x Exudate          | 1  | 0.8608   | 0.3582            | 1.433       |
|            | PE-MPs x Temperature x Exudate | 1  | 0.5527   | 0.4608            | 0.9202      |
| tGSH       | PE-MPs                         | 1  | 9.069    | <b>0.0042</b>     | 10.30       |
|            | Temperature                    | 1  | 27.05    | <b>&lt;0.0001</b> | 30.73       |
|            | Exudate                        | 1  | 1.992    | 0.1648            | 2.262       |
|            | PE-MPs x Temperature           | 1  | 0.5281   | 0.4710            | 0.5999      |
|            | PE-MPs x Exudate               | 1  | 0.03602  | 0.8503            | 0.04091     |
|            | Temperature x Exudate          | 1  | 2.119    | 0.1521            | 2.407       |
|            | PE-MPs x Temperature x Exudate | 1  | 0.01939  | 0.8898            | 0.02203     |
| AChE       | PE-MPs                         | 1  | 1.498    | 0.2270            | 2.339       |
|            | Temperature                    | 1  | 0.00232  | 0.9618            | 0.003626    |
|            | Exudate                        | 1  | 0.8623   | 0.3578            | 1.346       |
|            | PE-MPs x Temperature           | 1  | 7.468    | <b>0.0088</b>     | 11.66       |
|            | PE-MPs x Exudate               | 1  | 0.04106  | 0.8403            | 0.06411     |
|            | Temperature x Exudate          | 1  | 0.01092  | 0.9172            | 0.01705     |
|            | PE-MPs x Temperature x Exudate | 1  | 6.162    | <b>0.0166</b>     | 9.622       |
| LPO        | PE-MPs                         | 1  | 0.9362   | 0.3381            | 1.687       |
|            | Temperature                    | 1  | 0.2614   | 0.6115            | 0.4709      |
|            | Exudate                        | 1  | 0.3402   | 0.5625            | 0.6130      |
|            | PE-MPs x Temperature           | 1  | 0.1158   | 0.7351            | 0.2087      |
|            | PE-MPs x Exudate               | 1  | 0.06438  | 0.8008            | 0.1160      |
|            | Temperature x Exudate          | 1  | 3.595    | 0.0640            | 6.478       |
|            | PE-MPs x Temperature x Exudate | 1  | 2.183    | 0.1461            | 3.933       |
| PC         | PE-MPs                         | 1  | 0.3422   | 0.5618            | 0.6752      |
|            | Temperature                    | 1  | 0.1517   | 0.6989            | 0.2993      |
|            | Exudate                        | 1  | 0.8619   | 0.3586            | 1.701       |
|            | PE-MPs x Temperature           | 1  | 0.07288  | 0.7884            | 0.1375      |
|            | PE-MPs x Exudate               | 1  | 0.4139   | 0.5236            | 0.8167      |
|            | Temperature x Exudate          | 1  | 0.02356  | 0.8788            | 0.04648     |
|            | PE-MPs x Temperature x Exudate | 1  | 1.391    | 0.245             | 2.745       |
| HSP70      | PE-MPs                         | 1  | 0.5501   | 0.4621            | 0.9273      |
|            | Temperature                    | 1  | 6.746    | <b>0.0127</b>     | 11.37       |
|            | Exudate                        | 1  | 0.3903   | 0.5353            | 0.6579      |
|            | PE-MPs x Temperature           | 1  | 5.164    | <b>0.0279</b>     | 8.706       |
|            | PE-MPs x Exudate               | 1  | 0.1607   | 0.6904            | 0.2710      |
|            | Temperature x Exudate          | 1  | 0.005231 | 0.9427            | 0.008818    |
|            | PE-MPs x Temperature x Exudate | 1  | 1.578    | 0.2156            | 2.660       |

**Table S3.** Results of a 3-way ANOVA for the biochemical biomarkers responses in the muscle of *M. galloprovincialis* with exposure to *A. armata* exudate, PE-MPs and two different temperatures as factors.

| Biomarkers | Factor                         | df | F        | p                 | % Variation |
|------------|--------------------------------|----|----------|-------------------|-------------|
| AChE       | PE-MPs                         | 1  | 0.001636 | 0.9679            | 0.002124    |
|            | Temperature                    | 1  | 12.53    | <b>0.0009</b>     | 16.27       |
|            | Exudate                        | 1  | 4.206    | <b>0.0461</b>     | 5.462       |
|            | PE-MPs x Temperature           | 1  | 4.785    | <b>0.0339</b>     | 6.213       |
|            | PE-MPs x Exudate               | 1  | 8.682    | <b>0.0051</b>     | 11.27       |
|            | Temperature x Exsudate         | 1  | 1.699    | 0.1990            | 2.207       |
|            | PE-MPs x Temperature x Exudate | 1  | 1.664    | 0.2037            | 2.161       |
| LPO        | PE-MPs                         | 1  | 0.002159 | 0.9631            | 0.004301    |
|            | Temperature                    | 1  | 0.4173   | 0.5216            | 0.8311      |
|            | Exudate                        | 1  | 0.6884   | 0.4111            | 1.371       |
|            | PE-MPs x Temperature           | 1  | 0.1528   | 0.6977            | 0.3044      |
|            | PE-MPs x Exudate               | 1  | 0.08021  | 0.7783            | 0.1598      |
|            | Temperature x Exudate          | 1  | 3.377    | 0.0727            | 6.727       |
|            | PE-MPs x Temperature x Exudate | 1  | 0.5239   | 0.4729            | 1.044       |
| PC         | PE-MPs                         | 1  | 2.950    | 0.0926            | 3.771       |
|            | Temperature                    | 1  | 24.30    | <b>&lt;0.0001</b> | 31.06       |
|            | Exudate                        | 1  | 0.9438   | 0.3364            | 1.207       |
|            | PE-MPs x Temperature           | 1  | 1.623    | 0.2090            | 2.075       |
|            | PE-MPs x Exudate               | 1  | 0.6620   | 0.4200            | 0.8463      |
|            | Temperature x Exudate          | 1  | 1.731    | 0.1948            | 2.213       |
|            | PE-MPs x Temperature x Exudate | 1  | 0.2049   | 0.6529            | 0.2619      |

**Table S4.** Results of a 3-way ANOVA for the energy metabolism biomarkers responses in the muscle of *M. galloprovincialis* with exposure to *A. armata* exudate, PE-MPs and two different temperatures as factors.

| Biomarker | Factor                         | df | F         | p             | % Variation |
|-----------|--------------------------------|----|-----------|---------------|-------------|
| LDH       | PE-MPs                         | 1  | 0.03904   | 0.8442        | 0.06650     |
|           | Temperature                    | 1  | 1.823     | 0.1833        | 3.105       |
|           | Exudate                        | 1  | 2.694     | 0.1072        | 4.590       |
|           | PE-MPs x Temperature           | 1  | 1.793     | 0.1869        | 3.054       |
|           | PE-MPs x Exudate               | 1  | 0.4273    | 0.5164        | 0.7279      |
|           | Temperature x Exudate          | 1  | 2.432     | 0.1255        | 4.142       |
|           | PE-MPs x Temperature x Exudate | 1  | 1.497     | 0.2272        | 2.549       |
| Sugar     | PE-MPs                         | 1  | 0.4069    | 0.5267        | 0.7412      |
|           | Temperature                    | 1  | 2.648     | 0.1103        | 4.825       |
|           | Exudate                        | 1  | 0.1548    | 0.6958        | 0.2820      |
|           | PE-MPs x Temperature           | 1  | 2.490     | 0.1213        | 4.535       |
|           | PE-MPs x Exudate               | 1  | 1.007     | 0.3208        | 1.834       |
|           | Temperature x Exudate          | 1  | 1.042     | 0.3127        | 1.897       |
|           | PE-MPs x Temperature x Exudate | 1  | 0.007840  | 0.9298        | 0.01428     |
| Lipids    | PE-MPs                         | 1  | 0.4014    | 0.5294        | 0.6870      |
|           | Temperature                    | 1  | 0.05174   | 0.8210        | 0.08855     |
|           | Exudate                        | 1  | 0.8109    | 0.3724        | 1.388       |
|           | PE-MPs x Temperature           | 1  | 6.813     | <b>0.0120</b> | 11.66       |
|           | PE-MPs x Exudate               | 1  | 0.3077    | 0.5816        | 0.5266      |
|           | Temperature x Exudate          | 1  | 0.1988    | 0.6577        | 0.3402      |
|           | PE-MPs x Temperature x Exudate | 1  | 1.850     | 0.1802        | 3.165       |
| Protein   | PE-MPs                         | 1  | 0.0004154 | 0.9838        | 0.0007006   |
|           | Temperature                    | 1  | 9.252     | <b>0.0038</b> | 15.61       |
|           | Exudate                        | 1  | 0.8082    | 0.3731        | 1.363       |
|           | PE-MPs x Temperature           | 1  | 0.04694   | 0.8294        | 0.07917     |
|           | PE-MPs x Exudate               | 1  | 0.9254    | 0.3409        | 1.561       |
|           | Temperature x Exudate          | 1  | 0.1717    | 0.6804        | 0.2896      |
|           | PE-MPs x Temperature x Exudate | 1  | 0.07607   | 0.7839        | 0.1283      |
| ETS       | PE-MPs                         | 1  | 2.809     | 0.1002        | 4.993       |
|           | Temperature                    | 1  | 2.114     | 0.1524        | 3.758       |
|           | Exudate                        | 1  | 2.789     | 0.1014        | 4.957       |
|           | PE-MPs x Temperature           | 1  | 0.1947    | 0.6610        | 0.3460      |
|           | PE-MPs x Exudate               | 1  | 0.04103   | 0.8403        | 0.07292     |
|           | Temperature x Exudate          | 1  | 0.005964  | 0.9388        | 0.01060     |
|           | PE-MPs x Temperature x Exudate | 1  | 0.3052    | 0.5832        | 0.5425      |

**Table S5.** Results of a 3-way ANOVA for byssus production in *M. galloprovincialis* with exposure to *A. armata* exudate, PE-MPs and two different temperatures as factors.

| Byssus | Factor                         | df | F      | <i>p</i>      | % Variation |
|--------|--------------------------------|----|--------|---------------|-------------|
|        | PE-MPs                         | 1  | 0.1403 | 0.7090        | 0.1338      |
|        | Temperature                    | 1  | 1.122  | 0.2928        | 1.070       |
|        | Exudate                        | 1  | 2.300  | 0.1334        | 2.194       |
|        | PE-MPs x Temperature           | 1  | 0.3109 | 0.5787        | 0.2966      |
|        | PE-MPs x Exudate               | 1  | 0.1540 | 0.6958        | 0.1469      |
|        | Temperature x Exudate          | 1  | 10.65  | <b>0.0016</b> | 10.16       |
|        | PE-MPs x Temperature x Exudate | 1  | 11.93  | <b>0.0009</b> | 11.38       |
